# Supplementary material for: Prognostic Relevance of RIP140 and ERβ Expression in Unifocal Versus Multifocal Breast Cancers: A Preliminary Report
Source: MDPI journal article supplement (doi:10.3390/ijms20020418), 2019-01-18
Supplement: s1 [file s1]

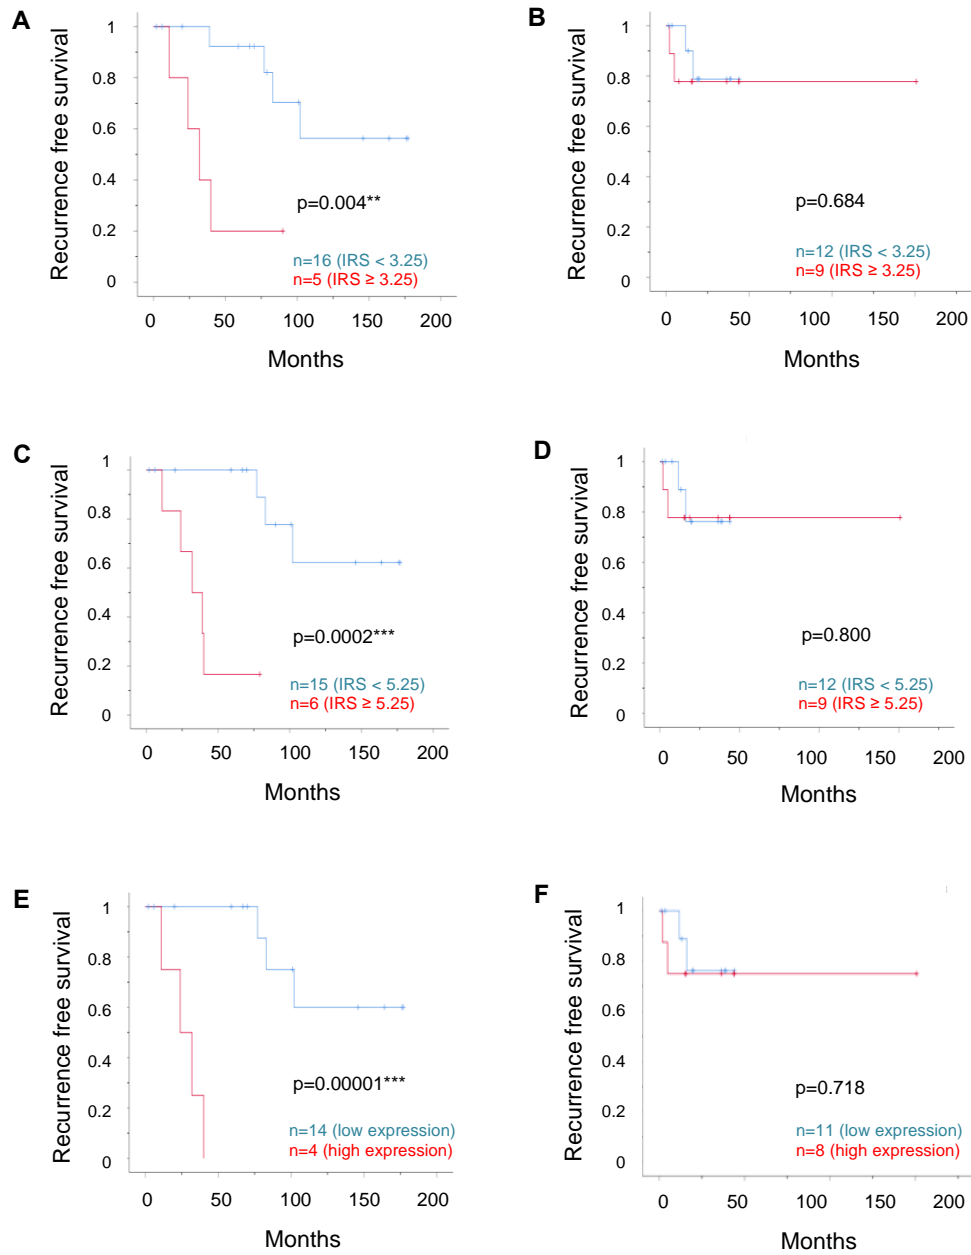

**Figure S1.** Recurrence free survival (RFS) according to the expression of RIP140 and ER $\beta$ , alone or combined. Kaplan–Meier analysis of the correlation between low vs. high expression of two markers with RFS in the matched pairs (unifocal for **A**, **C**, **E** and multifocal for **B**, **D**, **F**). The analysis was performed with RIP140 (**A**,**B**) or ER $\beta$  (**C**,**D**) expression, or with RIP140 expression combined with ER $\beta$  expression (**E**,**F**). Correlations are statistically significant for  $p < 0.01$  (\*\*) and for  $p < 0.001$  (\*\*\*).
